# Supplementary material
Source: PubMed Central journal article supplement (PMC1635378)
Supplement: mbc_E06-04-0282_1.pdf [file mbc_E06-04-0282_1.pdf]

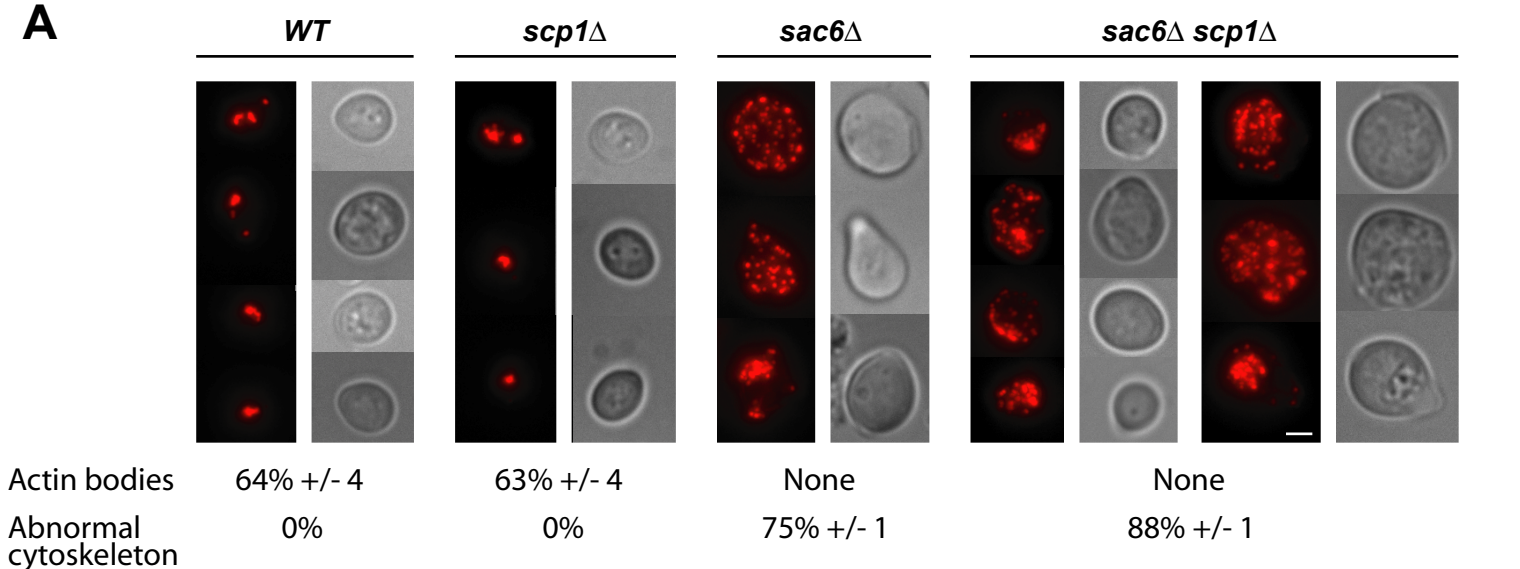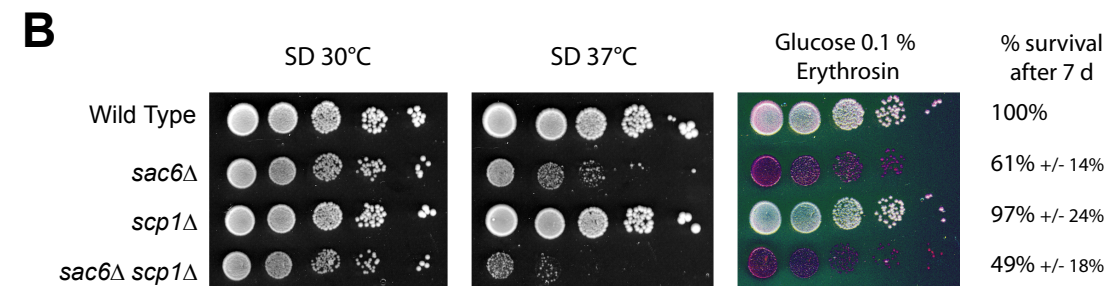

SUPPLEMENTARY FIGURE I

(A) Actin bodies formation in *sac6Δ*, *scp1Δ* and *sac6Δscp1Δ* mutants.

Wild type cells, *scp1Δ* cells, *sac6Δ* cells and *sac6Δscp1Δ* cells were grown 3 days in YPDA medium, fixed and stained with Alexa-Phalloidin. Percentage of cells with actin bodies and with an abnormal actin cytoskeleton are indicated. Bar 2 μm.

(B) Actin bundling mutants survival upon starvation and in stationary phase.

Serial dilution of cells were spotted onto regular SD casa WAU medium or synthetic medium containing casa, WUA, 0.1 % glucose and erythrosine, a dye that stains dead cells in pink (Bonneu et al 1991).

Viability of the strains after 7 days of growth at 30°C in YPDA medium is indicated on the right.
