# Supplementary material
Source: PubMed Central journal article supplement (PMC1635378)
Supplement: mbc_E06-04-0282_2.pdf [file mbc_E06-04-0282_2.pdf]

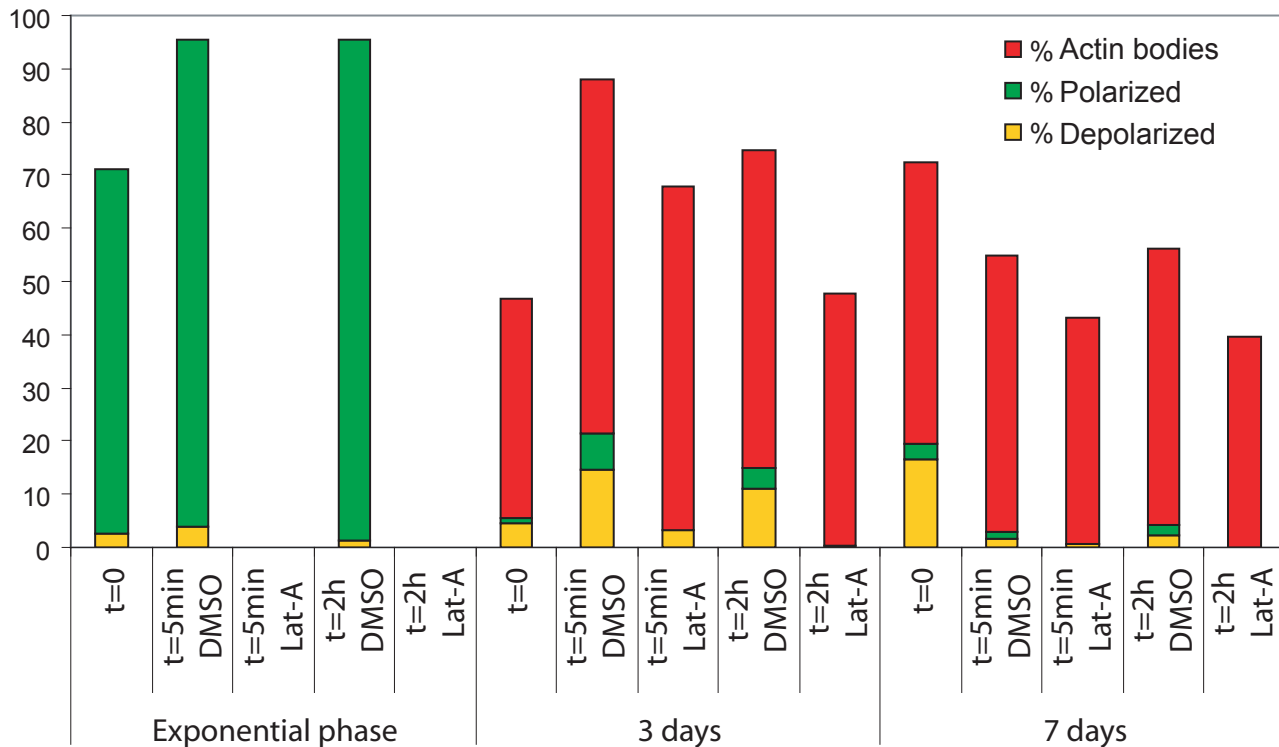

## SUPPLEMENTARY FIGURE 2

Actin bodies contain stable actin filaments.

Actin bodies are resistant to Latrunculin A (A). Wild type cells were grown at 30°C in YPDA medium. During exponential growth (top panel), after 3 days or 7 days of culture (bottom panel), cells were incubated 5 min or 2 h with either 200  $\mu$ M of Lat-A or DMSO as a control. Cells were then fixed and stained with Alexa-phalloidin. For each time point, cells with polarized actin cytoskeleton (green bar), depolarized actin cytoskeleton (yellow bar) or actin bodies (red bar) were counted ( $n > 200$ ).
