# Supplementary material
Source: PubMed Central journal article supplement (PMC1635378)
Supplement: mbc_E06-04-0282_3.pdf [file mbc_E06-04-0282_3.pdf]

**Supplementary table I: co-localization of GFP-fused ABPs with actin bodies**

| <i>Gene</i> | <i>Exponential phase</i> |              | <i>Stationary phase</i> |                                   |
|-------------|--------------------------|--------------|-------------------------|-----------------------------------|
|             | signal                   | localization | signal                  | co-localization with actin bodies |
| ABP1        | +++                      | P            | ++                      | Yes                               |
| ABP140      | ++                       | P + C        | ++                      | Yes                               |
| ARC15       | +++                      | P            | ++                      | Partial                           |
| ARC18       | +++                      | P            | ++                      | Partial                           |
| ARC19       | +                        | P            | ND                      | NA                                |
| ARC35       | +++                      | P            | ++                      | Partial                           |
| ARP2        | +++                      | P            | ++                      | Partial                           |
| BNI1        | +/-                      | T + N        | ND                      | NA                                |
| BNR1        | +/-                      | N            | ND                      | NA                                |
| BZZ1        | +                        | P            | ND                      | NA                                |
| CAP1        | ++                       | P            | +++                     | Yes                               |
| CAP2        | +++                      | P            | +++                     | Yes                               |
| CRN1        | +++                      | P            | ++                      | Partial                           |
| IQG1        | +                        | N            | ND                      | NA                                |
| LAS17       | +                        | P            | ND                      | NA                                |
| MYO1        | ++                       | N            | +                       | No                                |
| MYO2        | ++                       | T + N        | ND                      | NA                                |
| MYO3        | +/-                      | P            | ND                      | NA                                |
| MYO4        | +/-                      | T + N        | ND                      | NA                                |
| MYO5        | ++                       | P            | +/-                     | No                                |
| PAN1        | +++                      | P            | +/-                     | No                                |
| PFY1        | +++                      | Cytoplasm    | ++                      | NA                                |
| RVS167      | +/-                      | P            | +/-                     | No                                |
| SAC6        | ++                       | P            | ++                      | Yes                               |
| SCP1        | +                        | P            | ND                      | NA                                |
| SLA1        | +++                      | P            | +                       | No                                |
| SLA2        | +++                      | P            | +                       | No                                |
| SRV2        | +                        | P            | ++                      | Partial                           |
| VRP1        | +                        | P            | ND                      | NA                                |

P: patches; C: cables; T: bud tip; N: bud neck; ND: not detected; NA: not applicable.

**Supplementary table II: Actin bodies formation in ABP mutants**

| <b>Gene</b>    | <b>Morphology after 7d</b> | <b>Actin Bodies</b> |
|----------------|----------------------------|---------------------|
| WT             | WT                         | +                   |
| <i>abp1Δ</i>   | WT                         | +                   |
| <i>abp140Δ</i> | WT                         | +                   |
| <i>aip1Δ</i>   | WT                         | +                   |
| <i>arc18Δ</i>  | Abnormal                   | -                   |
| <i>bni1Δ</i>   | WT                         | +                   |
| <i>bnr1Δ</i>   | WT                         | +                   |
| <i>bud6Δ</i>   | WT                         | +/-                 |
| <i>bzz1Δ</i>   | WT                         | +                   |
| <i>cap1Δ</i>   | +/- WT                     | +/-                 |
| <i>cap2Δ</i>   | +/- WT                     | +/-                 |
| <i>crn1Δ</i>   | WT                         | +                   |
| <i>las17Δ</i>  | Abnormal                   | +/-                 |
| <i>myo3Δ</i>   | WT                         | +                   |
| <i>myo5Δ</i>   | WT                         | +/-                 |
| <i>rvs161Δ</i> | Abnormal                   | +/-                 |
| <i>rvs167Δ</i> | Abnormal                   | +/-                 |
| <i>sac6Δ</i>   | Abnormal                   | -                   |
| <i>scp1Δ</i>   | WT                         | +                   |
| <i>sla1Δ</i>   | WT                         | +                   |
| <i>sla2Δ</i>   | WT                         | +                   |
| <i>tpm1Δ</i>   | WT                         | +                   |
| <i>tpm2Δ</i>   | WT                         | +                   |
| <i>twf1Δ</i>   | WT                         | +/-                 |

“-“: no actin body detected

“+/-“: actin bodies detected in less than 50% of the cells

“+“: actin bodies detected in more than 50% of the cells.

The experiment was done twice. More than 200 cells were counted in each experiment.

**Supplementary table III: Effect of Lat-A on actin bodies disappearance upon cells re-feeding**

|                                                                                              | <i>Unstained cells</i> | <i>Depolarized cells</i> | <i>Cells with actin bodies after 15 min or more</i> | <i>Cells with actin bodies that disappeared and were replaced by depolarized actin patches after less than 15min</i> | <i>Cells with actin bodies that disappeared after less than 15min (No actin patches)</i> |
|----------------------------------------------------------------------------------------------|------------------------|--------------------------|-----------------------------------------------------|----------------------------------------------------------------------------------------------------------------------|------------------------------------------------------------------------------------------|
| + fresh media                                                                                | 1 %                    | 30 %                     | 1 %                                                 | 68 %                                                                                                                 | 0 %                                                                                      |
| Pre-incubation with Lat-A (200 $\mu$ M)                                                      | 11.5 %                 | 0 %                      | 87 %                                                | 1.5 %                                                                                                                | 0 %                                                                                      |
| Pre-incubation with Lat-A (200 $\mu$ M) then transfer into fresh media + Lat-A (200 $\mu$ M) | 12 %                   | 0.5 %                    | 14 %                                                | 0 %                                                                                                                  | 73.5 %                                                                                   |

More than 200 cells were counted in each experiment.
